# Supplementary material for: Intratumoral expression of IL-12 from lentiviral or RNA vectors acts synergistically with TLR4 agonist (GLA) to generate anti-tumor immunological memory
Source: PubMed Central journal article supplement (PMC8638928; doi:10.1371/journal.pone.0259301), 2021-12-02
Supplement: pone.0259301.s011.pdf [file pone.0259301.s011.pdf]

| Figure    | Test                             | Comparison                  | P Value | Significant? | # Animals            |
|-----------|----------------------------------|-----------------------------|---------|--------------|----------------------|
| Figure 1A | 1-way ANOVA+Tukey                | NILV/GFP vs ILV/GFP         | <0.0001 | Y            | N/A                  |
| Figure 1B | 1-way ANOVA+Tukey                | NILV/GFP vs ILV/GFP         | <0.0001 | Y            | N/A                  |
| Figure 1C | 1-way ANOVA+Tukey per time point | NILV/GFP vs ILV/GFP, Day 3  | 0.08    | N            | n = 6, total = 12    |
| Figure 1C | 1-way ANOVA+Tukey per time point | NILV/GFP vs ILV/GFP, Day 4  | 0.006   | Y            | n = 6, total = 12    |
| Figure 1C | 1-way ANOVA+Tukey per time point | NILV/GFP vs ILV/GFP, Day 7  | <0.0001 | Y            | n = 6, total = 12    |
| Figure 1E | 1-way ANOVA+Tukey per time point | NILV/GFP vs ILV/GFP, Day 6  | 0.13    | N            | n = 4-7, total = 18  |
| Figure 1E | 1-way ANOVA+Tukey per time point | NILV/GFP vs ILV/GFP, Day 15 | 0.02    | Y            | n = 4-7, total = 18  |
| Figure 1F | 1-way ANOVA+Tukey per time point | NILV/GFP vs ILV/GFP, Day 6  | 0.02    | Y            | n = 4-7, total = 18  |
| Figure 1F | 1-way ANOVA+Tukey per time point | NILV/GFP vs ILV/GFP, Day 15 | <0.0001 | Y            | n = 4-7, total = 18  |
| Figure 1F | 1-way ANOVA+Tukey per time point | NILV/GFP vs ILV/GFP, Day 21 | 0.001   | Y            | n = 4-7, total = 18  |
| Figure 2A | 1-way ANOVA+Tukey per time point | NILV/GFP vs ILV/GFP, Day 6  | 0.13    | N            | n = 4-7, total = 18  |
| Figure 2A | 1-way ANOVA+Tukey per time point | NILV/GFP vs ILV/GFP, Day 15 | 0.02    | Y            | n = 4-7, total = 18  |
| Figure 2B | 1-way ANOVA+Tukey per time point | NILV/GFP vs ILV/GFP, Day 6  | 0.02    | Y            | n = 4-7, total = 18  |
| Figure 2B | 1-way ANOVA+Tukey per time point | NILV/GFP vs ILV/GFP, Day 15 | <0.0001 | Y            | n = 4-7, total = 18  |
| Figure 2B | 1-way ANOVA+Tukey per time point | NILV/GFP vs ILV/GFP, Day 21 | 0.001   | Y            | n = 4-7, total = 18  |
| Figure 2D | Log rank (Mantel-Cox)            | Untreated vs RT-mut/mL12    | 0.91    | N            | n = 8, total = 24    |
| Figure 2D | Log rank (Mantel-Cox)            | RT-mut/mL12 vs ILV/mL12     | 0.0002  | Y            | n = 8, total = 24    |
| Figure 3C | Log rank (Mantel-Cox)            | Untreated vs ILV/mL12       | 0.29    | N            | n = 8, total = 16    |
| Figure 3F | Log rank (Mantel-Cox)            | Untreated vs ILV/mL12       | <0.0001 | Y            | n = 8, total = 16    |
| Figure 3I | Log rank (Mantel-Cox)            | Untreated vs ILV/mL12       | 0.009   | Y            | n = 9, total = 18    |
| Figure 3K | Mann-Whitney T test              | Untreated vs ILV/mL12       | 0.0003  | Y            | n = 7-8, total = 15  |
| Figure 4A | Log rank (Mantel-Cox)            | Cntrl Ab vs aCD8            | 0.37    | N            | n = 8-9, total = 30  |
| Figure 4A | Log rank (Mantel-Cox)            | Cntrl Ab vs aCD4            | 0.17    | N            | n = 8-9, total = 30  |
| Figure 4A | Log rank (Mantel-Cox)            | Cntrl Ab vs aNK             | 0.39    | N            | n = 8-9, total = 30  |
| Figure 4B | Log rank (Mantel-Cox)            | Cntrl Ab vs aCD8, CD4       | <0.0001 | Y            | n = 5-10, total = 32 |

|            |                       |                                           |         |   |                      |
|------------|-----------------------|-------------------------------------------|---------|---|----------------------|
| Figure 4B  | Log rank (Mantel-Cox) | Cntrl Ab vs aCD8, aNK                     | 0.002   | Y | n = 5-10, total = 32 |
| Figure 4B  | Log rank (Mantel-Cox) | Cntrl Ab vs CD4, aNK                      | 0.12    | N | n = 5-10, total = 32 |
| Figure 5D  | Log rank (Mantel-Cox) | Untreated vs srRNA/mL12                   | <0.0001 | Y | n = 9-10, total = 19 |
| Figure 5F  | Log rank (Mantel-Cox) | Untreated vs srRNA/mL12                   | <0.0001 | Y | n = 8-9, total = 17  |
| Figure 5H  | 1-way ANOVA+Tukey     | Untreated vs srRNA/mL12, IT               | 0.0016  | Y | n = 8-10, total = 28 |
| Figure 5H  | 1-way ANOVA+Tukey     | Untreated vs srRNA/mL12, SC               | <0.0001 | Y | n = 8-10, total = 28 |
| Figure 6B  | Log rank (Mantel-Cox) | srRNA/mL12 vs GLA-SE+srRNA/mL12           | 0.007   | Y | n = 9-10, total = 36 |
| Figure 6C  | 1-way ANOVA+Tukey     | mTRP1, Untreated vs srRNA/mL12            | 0.85    | N | n = 9-10, total = 36 |
| Figure 6C  | 1-way ANOVA+Tukey     | mTRP1, Untreated vs GLA-SE+srRNA/mL12     | 0.04    | Y | n = 9-10, total = 36 |
| Figure 6C  | 1-way ANOVA+Tukey     | gp100, Untreated vs srRNA/mL12            | 0.43    | N | n = 9-10, total = 36 |
| Figure 6C  | 1-way ANOVA+Tukey     | gp100, Untreated vs GLA-SE+srRNA/mL12     | 0.005   | Y | n = 9-10, total = 36 |
| SuppFig 1C | Log rank (Mantel-Cox) | NILV/mL12 vs ILV/mL12, colon              | 0.037   | Y | n = 6, total = 12    |
| SuppFig 1C | Log rank (Mantel-Cox) | NILV/mL12 vs ILV/mL12, mammary            | 0.0003  | Y | n = 6, total = 12    |
| SuppFig 1C | Log rank (Mantel-Cox) | NILV/mL12 vs ILV/mL12, B cell             | 0.38    | N | n = 6, total = 12    |
| SuppFig 1C | Log rank (Mantel-Cox) | NILV/mL12 vs ILV/mL12, melanoma (footpad) | 0.0018  | Y | n = 6, total = 12    |
| SuppFig 1C | Log rank (Mantel-Cox) | NILV/mL12 vs ILV/mL12, melanoma (flank)   | 0.27    | N | n = 6, total = 12    |
| SuppFig 1C | Log rank (Mantel-Cox) | NILV/mL12 vs ILV/mL12, mastocytoma        | 0.95    | N | n = 6, total = 12    |
| SuppFig 1D | Mann-Whitney          | Untreated vs ILV/mL12                     | 0.0007  | Y | n = 5-10, total = 15 |
| SuppFig 4B | Unpaired T test       | srRNA/GFP vs mRNA/GFP                     | 0.02    | Y | n = 5-10, total = 32 |
| SuppFig 5B | Log rank (Mantel-Cox) | Untreated vs srRNA/mL12, 1x               | <0.0001 | Y | n = 6-8, total = 21  |
| SuppFig 5D | Log rank (Mantel-Cox) | Untreated vs srRNA/mL12, 1x               | 0.002   | Y | n = 9-10, total = 19 |
| SuppFig5D  | Log rank (Mantel-Cox) | Untreated vs srRNA/mL12, weekly           | 0.0007  | Y | n = 9-10, total = 19 |
| SuppFig6C  | Log rank (Mantel-Cox) | srRNA/mL12 vs GLA-SE+srRNA/mL12           | 0.29    | N | n = 9-10, total = 36 |
|            |                       |                                           |         |   |                      |
